# Supplementary material for: Tetraaryl pyrazole polymers: versatile synthesis, aggregation induced emission enhancement and detection of explosives
Source: Royal Society of Chemistry journal article supplement (doi:10.1039/c5py01218j), 2015-01-01

# Tetraaryl Pyrazole Polymers: Versatile Synthesis, Aggregation Induced Emission Enhancement and Detection of Explosives

Vanga Mukundam<sup>[a]</sup> Atul Kumar<sup>[a]</sup>, Kunchala Dhanunjayarao<sup>[a]</sup>, Arthi Ravi<sup>[a]</sup>, S. Peruncheralathan<sup>[a]</sup> and Krishnan Venkatasubbaiah<sup>\*[a]</sup>

## Experimental Section:

### General

Reagents and starting materials were purchased from Alfa-Aesar, Sigma-Aldrich and Spectrochem chemical companies and used as received unless otherwise noted. Chlorinated solvents were distilled from CaH<sub>2</sub>. THF was distilled from Na/benzophenone prior to use. 1,3,5-triphenyl-1*H*-pyrazole was prepared according to literature procedure.<sup>1</sup> All 400 MHz <sup>1</sup>H and 100 MHz <sup>13</sup>C NMR spectra were recorded on a Bruker ARX 400 spectrometer operating at 400 MHz and referenced internally to solvent signals. All NMR spectra were recorded at ambient temperature. ESI mass spectra were recorded on Bruker, micrOTOF-QII mass spectrometer. The absorbance spectra were recorded on a Perkin Elmer Lambda 750 UV–visible spectrometer. The fluorescence spectra were recorded on a Perkin Elmer LS-55 Fluorescence Spectrometer. The fluorescence spectra were corrected for the instrumental response. Thermogravimetric analyses (TGA) were recorded on a PerkinElmer Pyris 6 TGA model in a nitrogen atmosphere at a heating rate of 20 °C min<sup>-1</sup>. Differential scanning calorimetric (DSC) analyses were recorded on a PerkinElmer Pyris 6 DSC model in a nitrogen atmosphere at a heating rate of 10 °C min<sup>-1</sup>. Gel-permeation chromatography (GPC) analyses were performed on a Shimadzu-LC20AD system referenced to poly(styrene) standards. THF was used as the mobile phase with a flow rate of 1.0 mL min<sup>-1</sup>. Single-crystal X-ray diffraction data were collected on a Bruker APEX-II diffractometer equipped with an Oxford Instruments low-temperature attachment. The data were collected at 296 K using Mo-K $\alpha$  radiation (0.71073 Å). Crystallographic data for **3c** and details of X-ray diffraction experiments and crystal structure refinements are given in Table S2. SADABS absorption corrections were applied in both cases.<sup>2</sup> The structures were solved and

refined with SHELX suite of programs.<sup>3</sup> All non-hydrogen atoms were refined with anisotropic displacement coefficients. The H atoms were placed at calculated positions and were refined as riding atoms. Crystallographic data for the structure **3c** has been deposited with the Cambridge Crystallographic Data Center as supplementary publication no. CCDC-1413712. Copies of the data can be obtained free of charge on application to CCDC, 12 Union Road, Cambridge CB2 1EZ, UK (fax: (+44) 1223-336-033; email: [deposit@ccdc.cam.ac.uk](mailto:deposit@ccdc.cam.ac.uk)).

#### Reference:

1. R. Mamidala, V. Mukundam, K. Dhanunjayarao, K. Venkatasubbaiah, *Dalton Trans.* **2015**, *44*, 5805.
2. G. M. Sheldrick, SADABS Program for Correction of Area Detector Data; University of Gottingen: Gottingen, Germany, 1999.
3. SHELXTL, Package v. 6.10, BrukerAXS, Madison and WI.

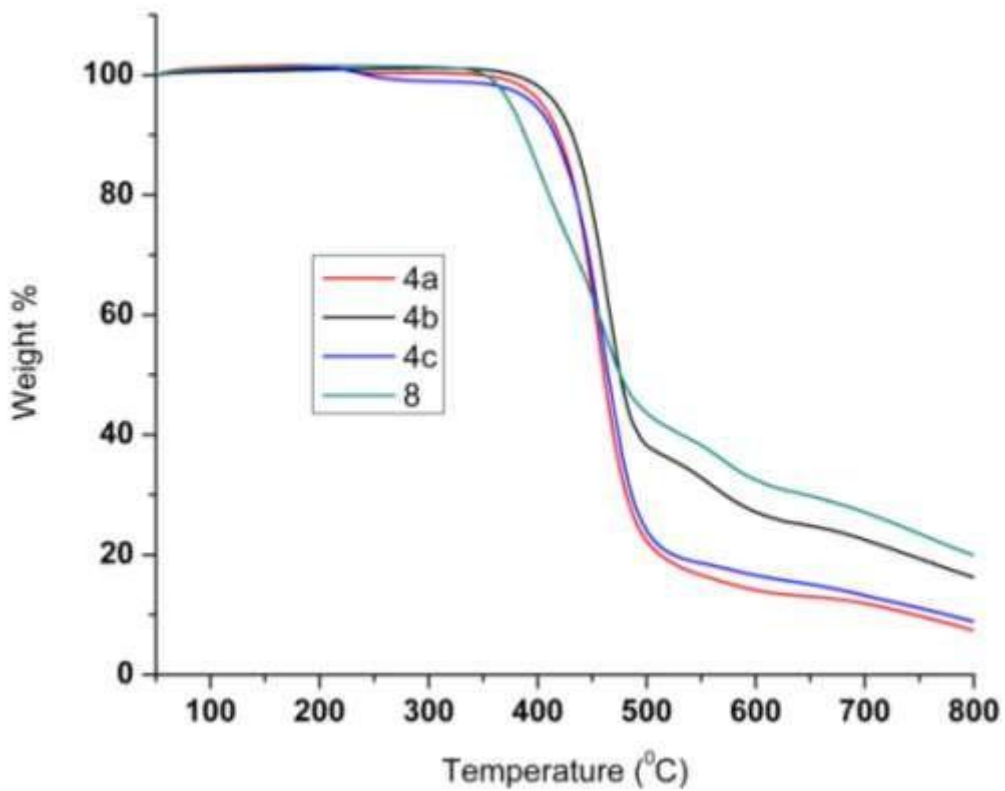

**Figure S1.** Thermogravimetric analysis traces of polymer **4a-4c** & **8** recorded under nitrogen at a heating rate of 20 °C/min

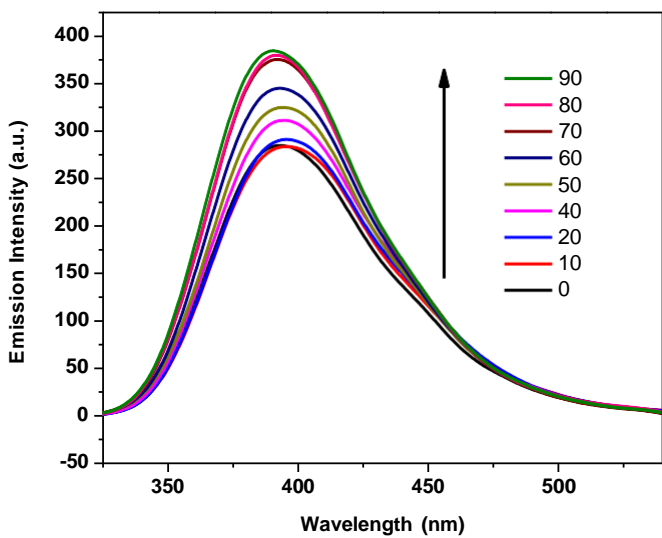

**Figure S2.** Fluorescence spectra of polymer **4b** ( $2.2 \times 10^{-5}$  M) in THF/water mixtures with different water fraction (fw).

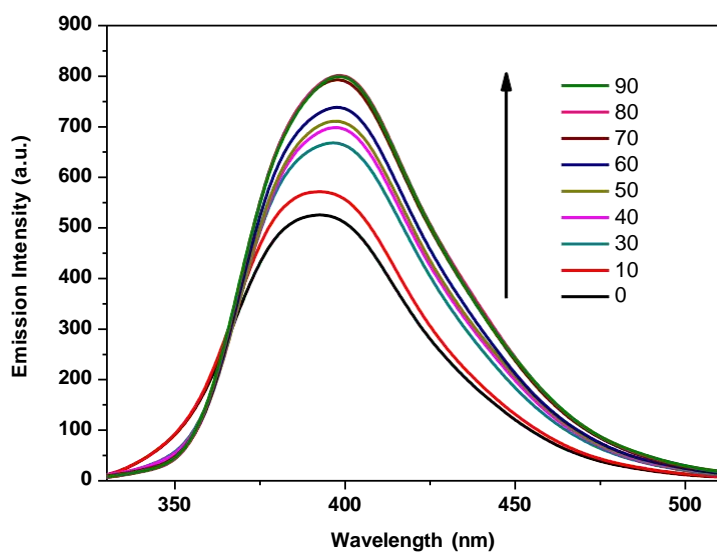

**Figure S3.** Fluorescence spectra of polymer **4c** ( $2.2 \times 10^{-5}$  M) in THF/water mixtures with different water fraction (fw).

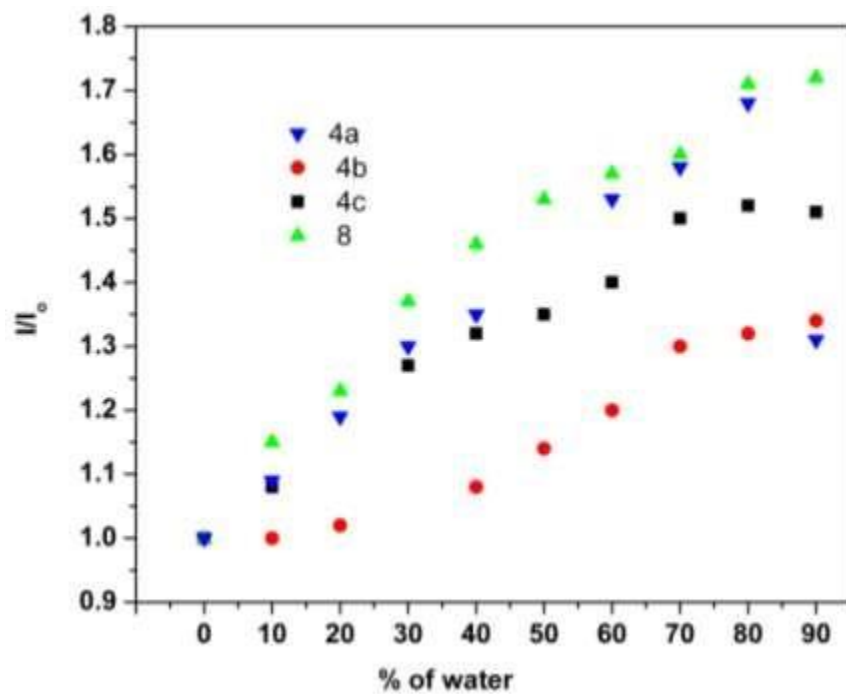

**Figure S4.** Effects of water addition on Fluorescence Intensity ( $I$ ) of Polymers

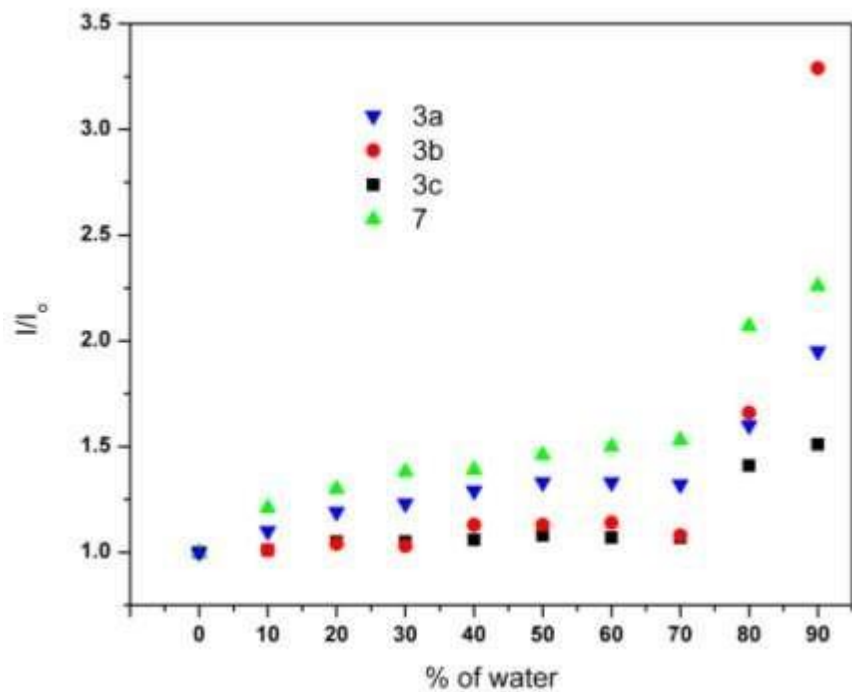

**Figure S5.** Effects of water addition on Fluorescence Intensity (I) of Monomers

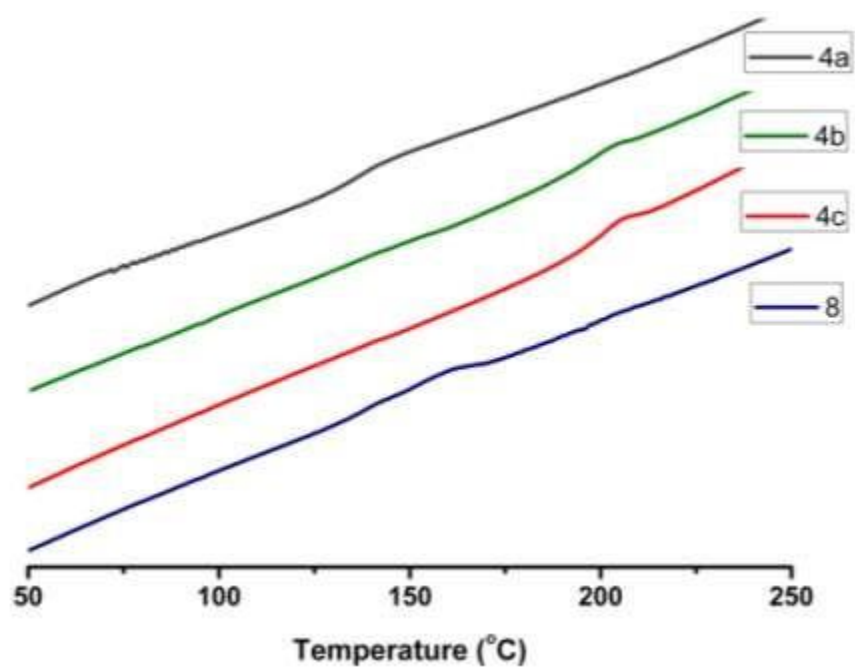

**Figure S6.** DSC traces of polymer **4a-4c** & **8** recorded under nitrogen at a heating rate of 20 °C/min

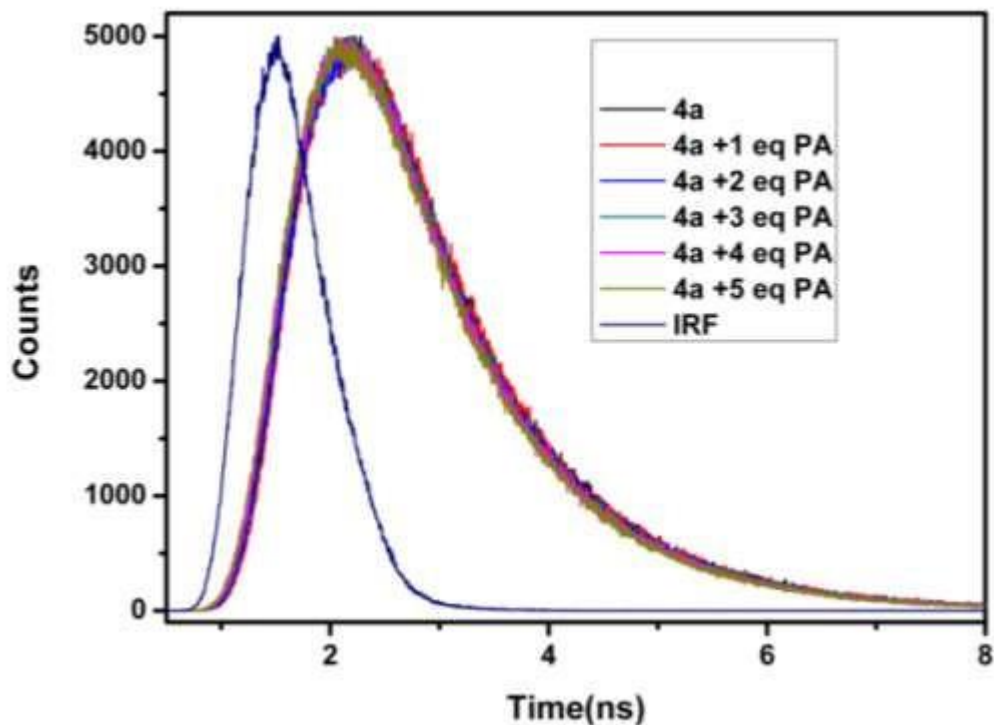

**Figure S7.** Fluorescence lifetime decay profile of polymer **4a** ( $2.2 \times 10^{-5}$  M) in THF/H<sub>2</sub>O (3:7) mixture for different concentrations of picric acid (PA). IRF= instrument response function.  $\lambda_{\text{ex}} = 280$  nm.

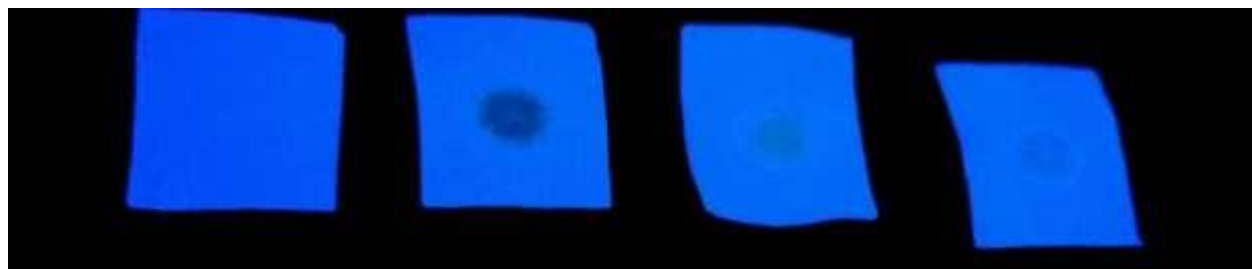

**Figure S8.** Color of fluorescent strips under UV light before and after addition of different concentration of picric acid (from left to right: blank,  $10^{-3}$ ,  $10^{-4}$ ,  $10^{-5}$  M(PA)).

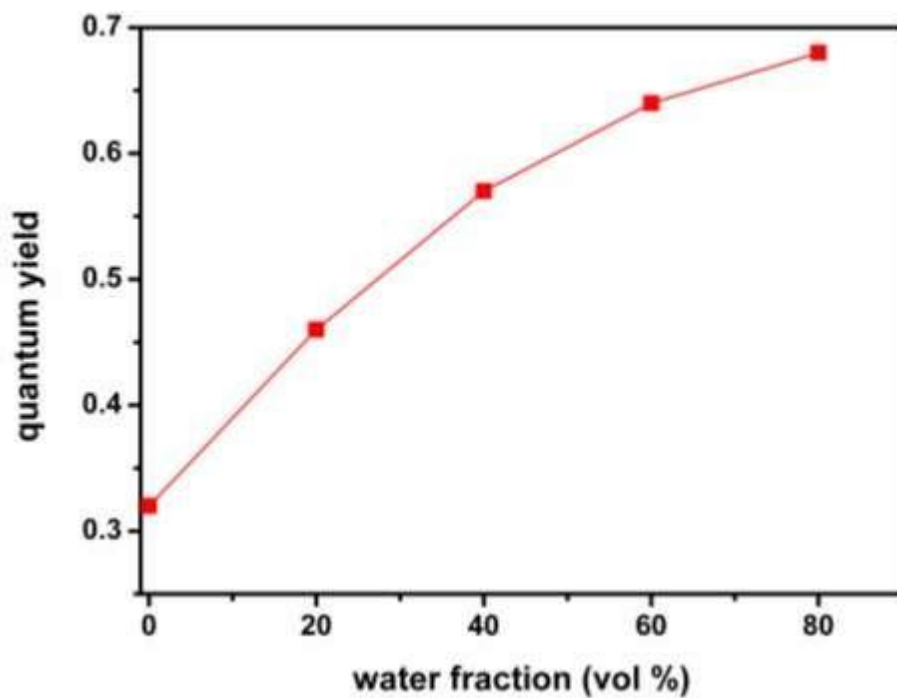

**Figure S9.** Variation of quantum yields of polymer 4a with water fraction in the THF/H<sub>2</sub>O mixture

**Table S1.** Optical properties of the monomers (**3a-3c** & **7**) and polymers (**4a-4c** & **8**) in the solution and aggregated state

| Compound  | $\lambda_{ab}/\text{nm}$ | $\lambda_{em}/\text{nm}$ | $\Phi_F(\text{THF})^a$ | $\Phi_{F,agg}^{a,b}$ |
|-----------|--------------------------|--------------------------|------------------------|----------------------|
| <b>3a</b> | 282                      | 379                      | 0.34                   | 0.64                 |
| <b>3b</b> | 282                      | 392                      | 0.33                   | 0.58                 |
| <b>3c</b> | 281                      | 394                      | 0.53                   | 0.93                 |
| <b>7</b>  | 295                      | 387                      | 0.38                   | 0.76                 |
| <b>4a</b> | 281                      | 379                      | 0.32                   | 0.68                 |
| <b>4b</b> | 282                      | 394                      | 0.35                   | 0.55                 |
| <b>4c</b> | 281                      | 396                      | 0.52                   | 0.95                 |
| <b>8</b>  | 296                      | 387                      | 0.42                   | 0.80                 |

<sup>a</sup> Measured using *p*-terphenyl in cyclohexane ( $\Phi_F = 0.82$ ). <sup>b</sup> Aggregates formed in THF/water mixture (20:80).

**Table S2.** Details of X-ray crystal structure analyses of compound **3c**.

| Compound <b>3c</b>                                            |                                                               |
|---------------------------------------------------------------|---------------------------------------------------------------|
| Empirical formula                                             | C <sub>30</sub> H <sub>21</sub> F <sub>3</sub> N <sub>2</sub> |
| M <sub>r</sub>                                                | 466.49                                                        |
| T [K]                                                         | 296(2)                                                        |
| wavelength [Å]                                                | 0.71073 Å                                                     |
| crystal system                                                | Monoclinic                                                    |
| space group                                                   | C2/c                                                          |
| a [Å]                                                         | 28.3793(16)                                                   |
| b [Å]                                                         | 8.2635(4)                                                     |
| c [Å]                                                         | 21.2253(14)                                                   |
| α [°]                                                         | 90                                                            |
| β [°]                                                         | 112.455(7)                                                    |
| γ [°]                                                         | 90                                                            |
| V [Å <sup>3</sup> ]                                           | 4600.2(5)                                                     |
| Z                                                             | 8                                                             |
| ρ <sub>calc</sub> [g cm <sup>-3</sup> ]                       | 1.347                                                         |
| μ (MoKα) [mm <sup>-1</sup> ]                                  | 0.096                                                         |
| F (000)                                                       | 1936                                                          |
| Crystal size [mm]                                             | 0.25 x 0.23 x 0.21                                            |
| θ range [°]                                                   | 1.55 – 25.80                                                  |
| limiting indices                                              | -34<=h<=34<br>-10<=k<=9<br>-25<=l<=25                         |
| reflns collected                                              | 27952                                                         |
| independent reflns                                            | 4370                                                          |
|                                                               | [R(int) = 0.0873]                                             |
| absorption correction                                         | Semi-empirical from<br>equivalents                            |
| refinement method                                             | Full-matrix least square on F <sup>2</sup>                    |
| data / restraints / parameters                                | 4370 / 0 / 316                                                |
| Goodness-of-fit on F <sup>2</sup>                             | 1.076                                                         |
| final R indices                                               | R <sub>I</sub> = 0.0618                                       |
| [ I > 2σ(I) ] <sup>[a]</sup>                                  | wR <sub>2</sub> = 0.1703                                      |
| R indices (all data) <sup>[a]</sup>                           | R <sub>I</sub> = 0.1000<br>wR <sub>2</sub> = 0.2030           |
| peak <sub>max</sub> /hole <sub>min</sub> [e Å <sup>-3</sup> ] | 0.700 and -0.487                                              |

$$^{[a]} R_I = \frac{\sum ||F_o| - |F_c||}{\sum |F_o|}; wR_2 = \left\{ \frac{\sum w(F_o^2 - F_c^2)^2}{\sum w(F_o^2)^2} \right\}^{1/2}.$$



# Compound **3a** $^1\text{H}$ NMR

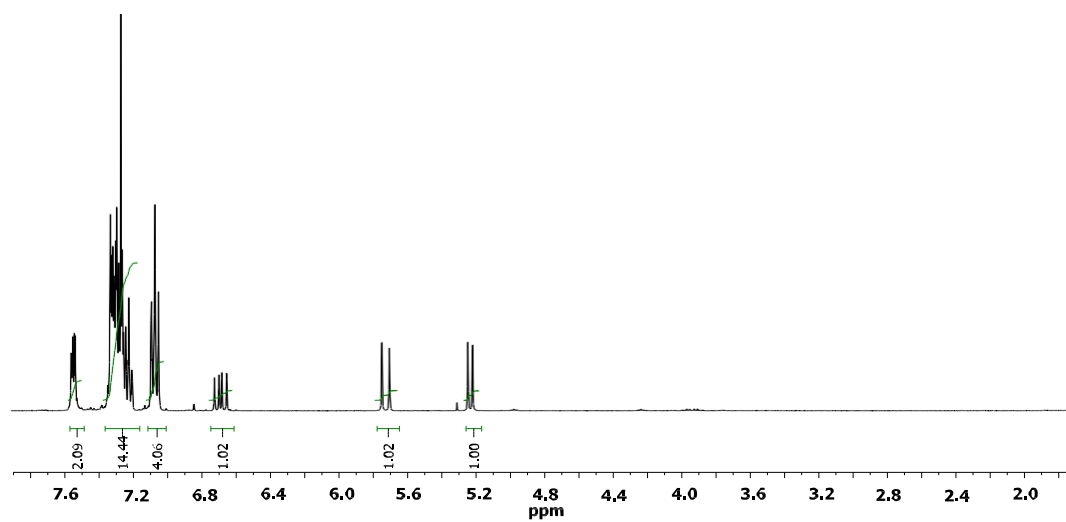

# Compound **3a** $^{13}\text{C}$ NMR

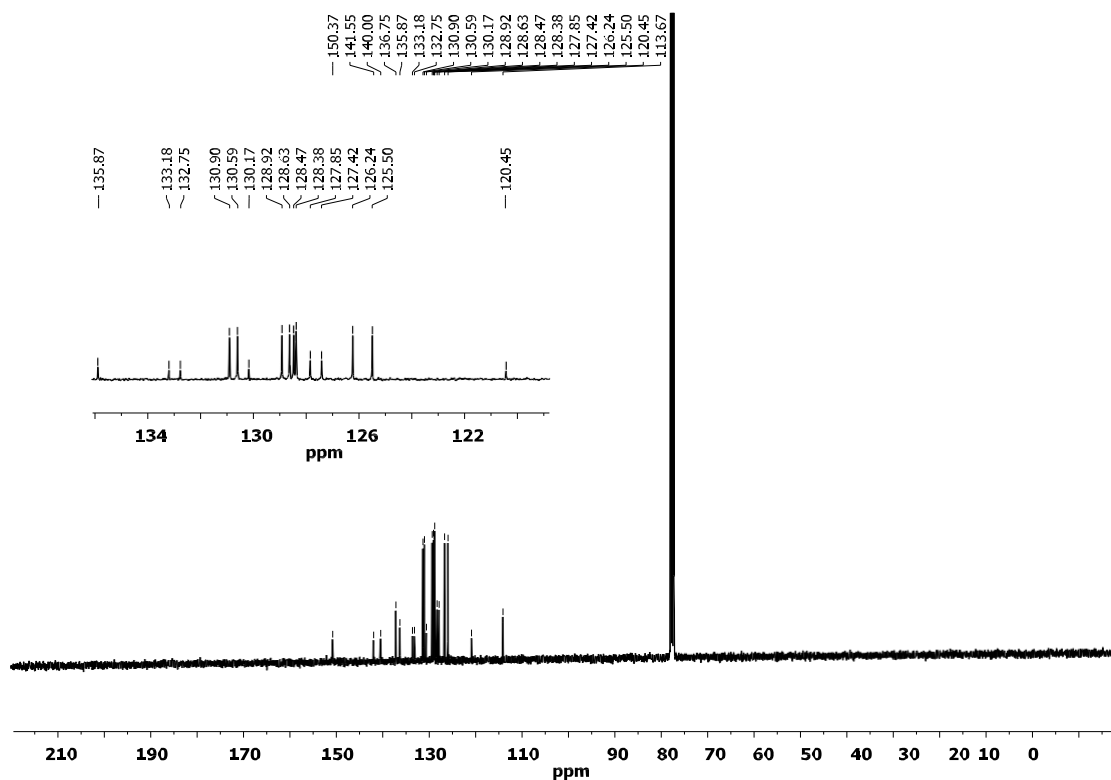

### Compound **3a** HRMS

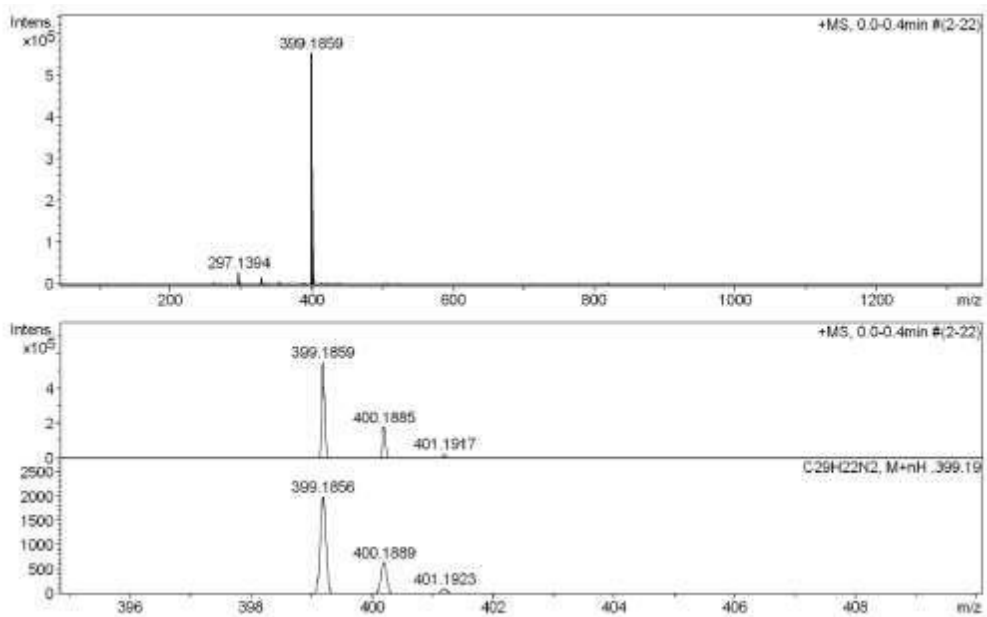

### Compound **3b** <sup>1</sup>H NMR

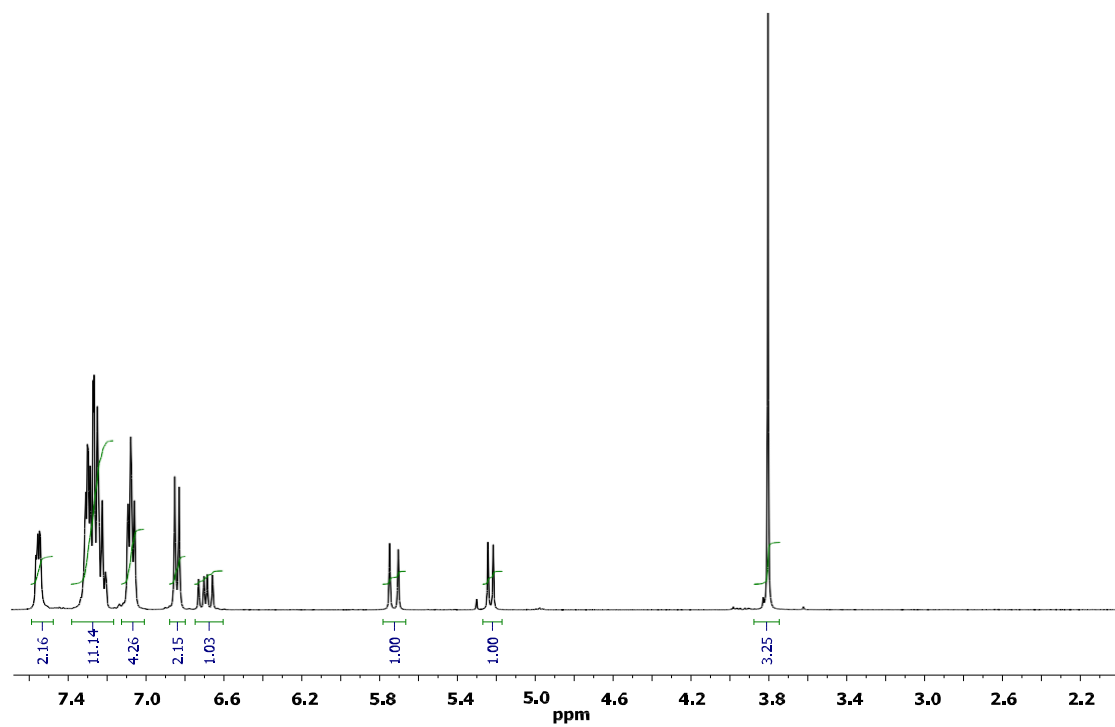

### Compound **3b** <sup>13</sup>C NMR

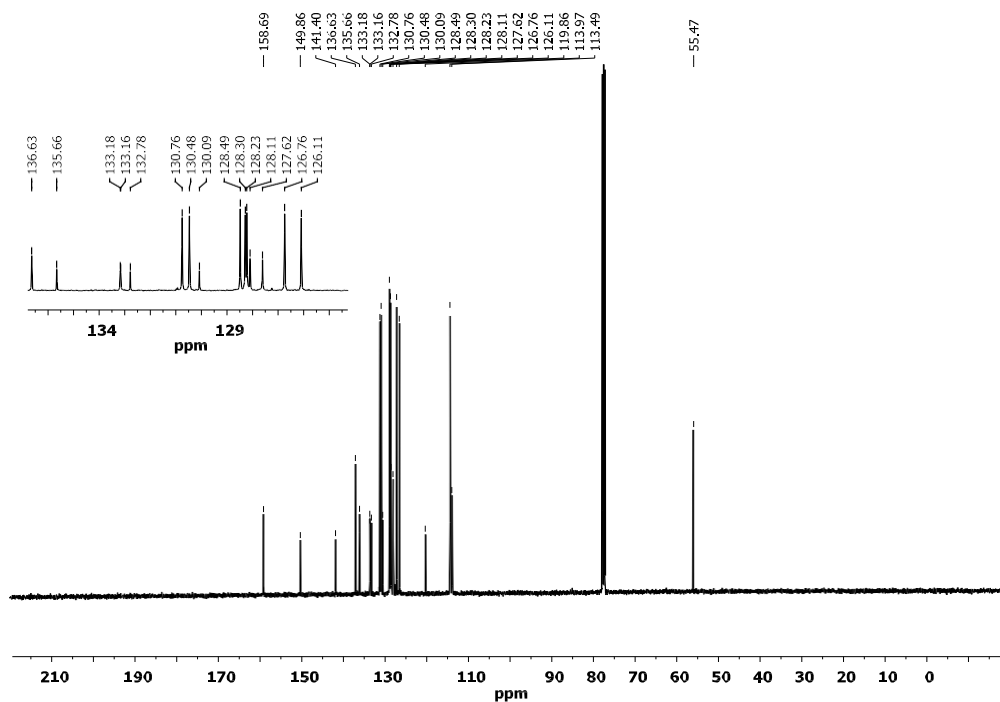

### Compound **3b** HRMS

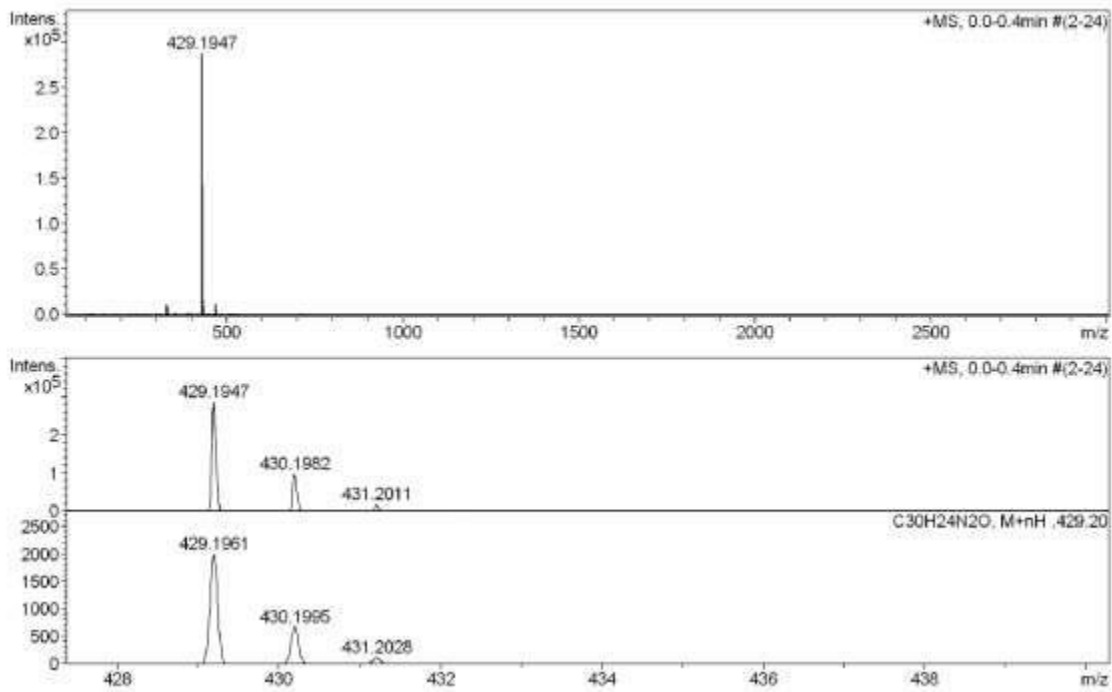

### Compound 3c $^1\text{H}$ NMR

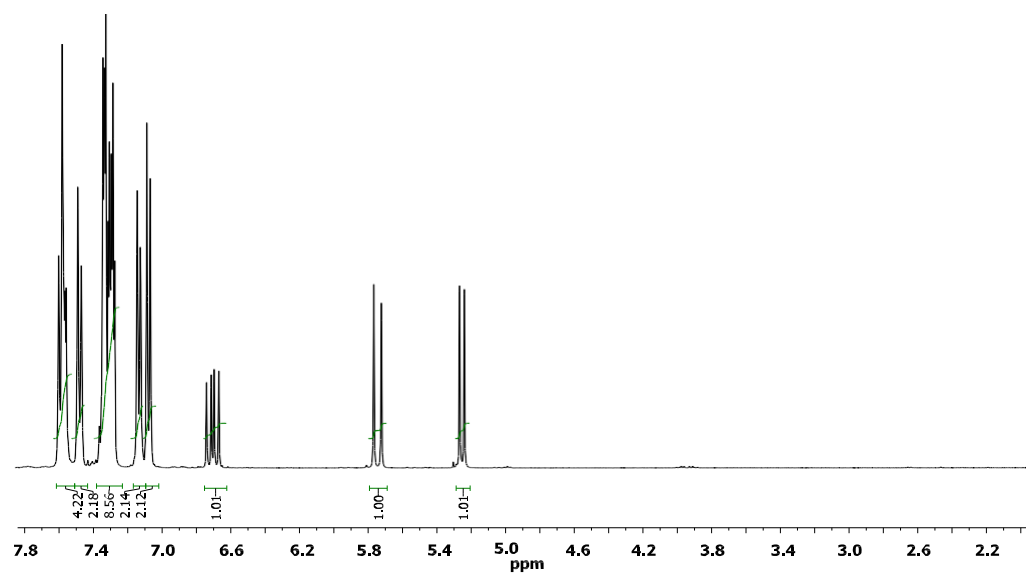

### Compound 3c $^{13}\text{C}$ NMR

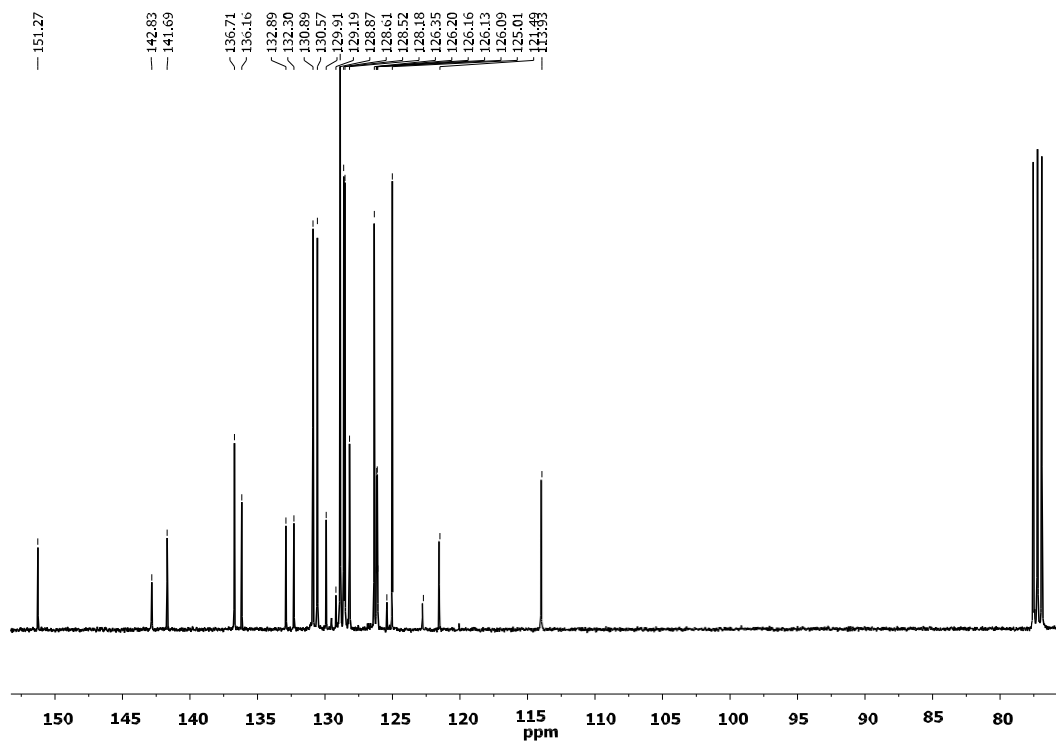

### Compound 3c HRMS

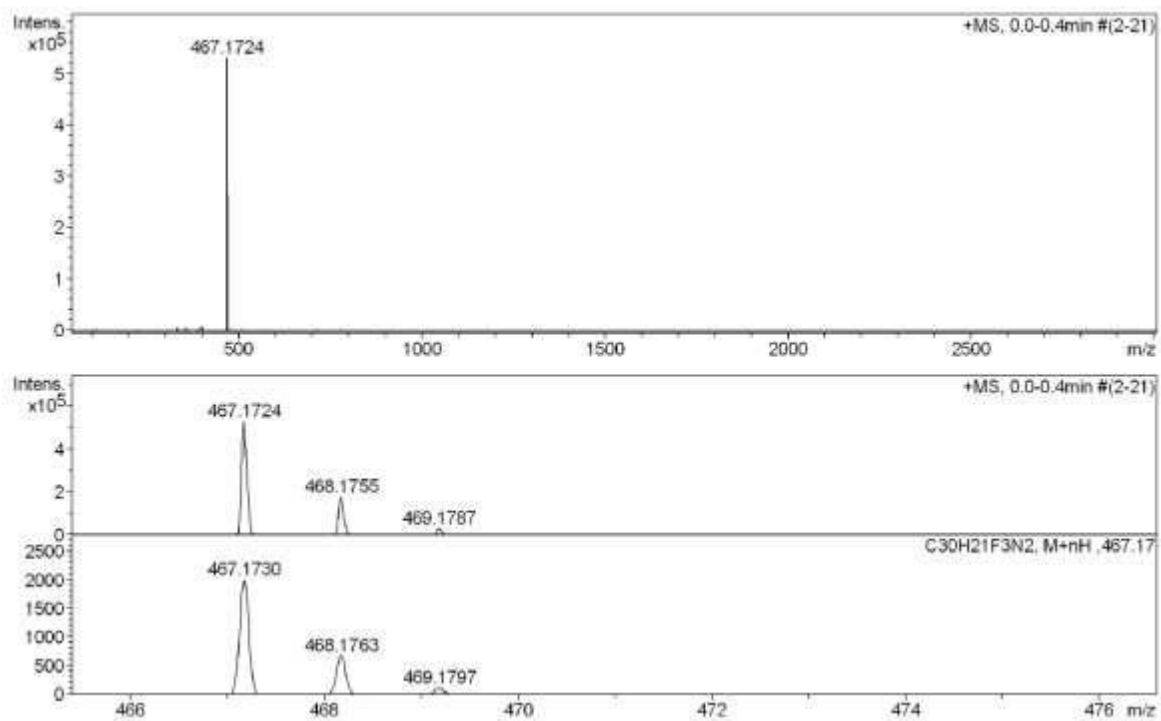

### Compound 7 <sup>1</sup>H NMR

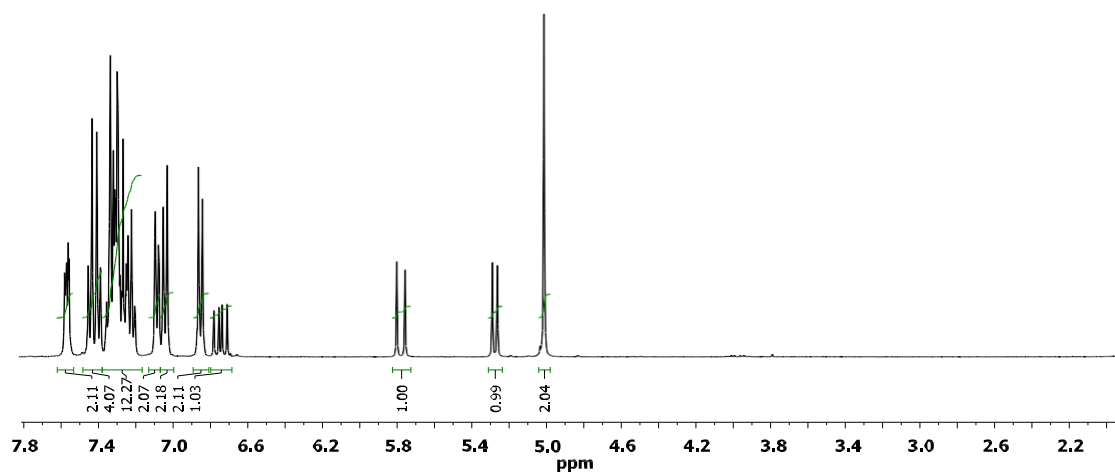

# Compound 7 <sup>13</sup>C NMR

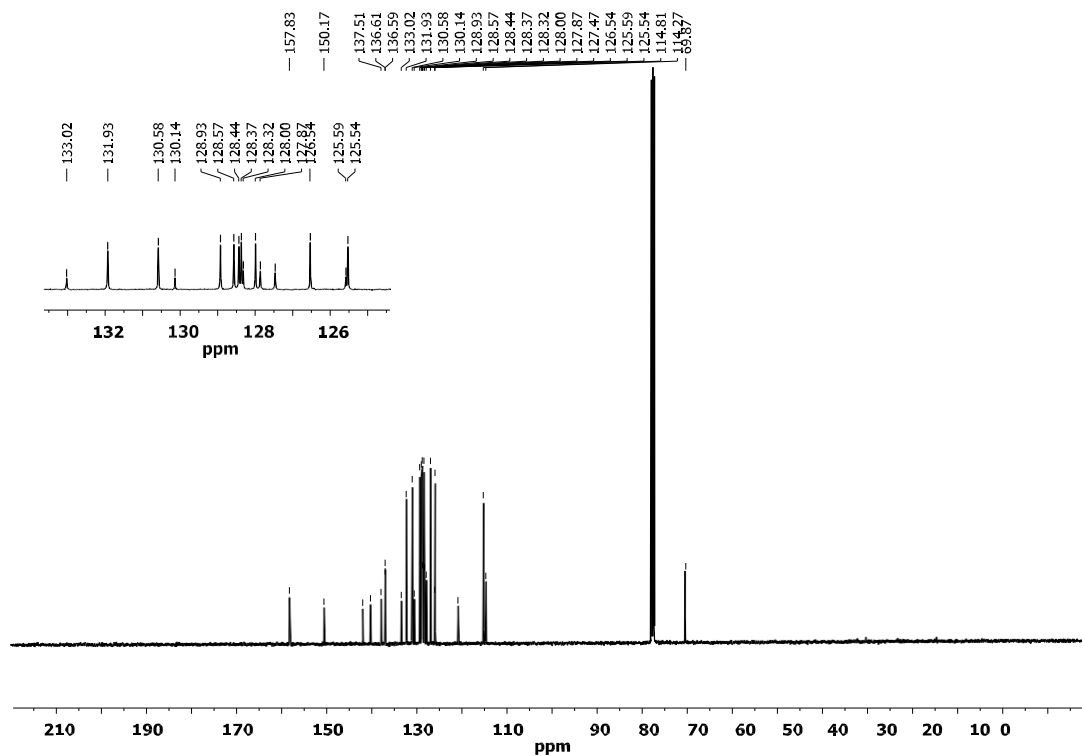

# Compound 7 HRMS

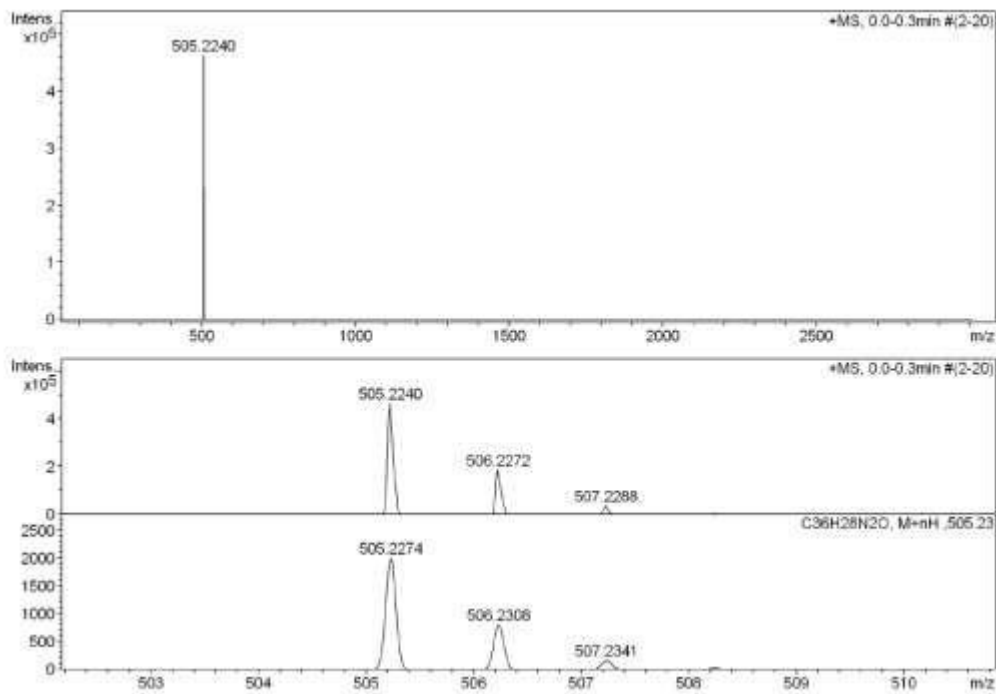

# Polymer **4a** $^1\text{H}$ NMR

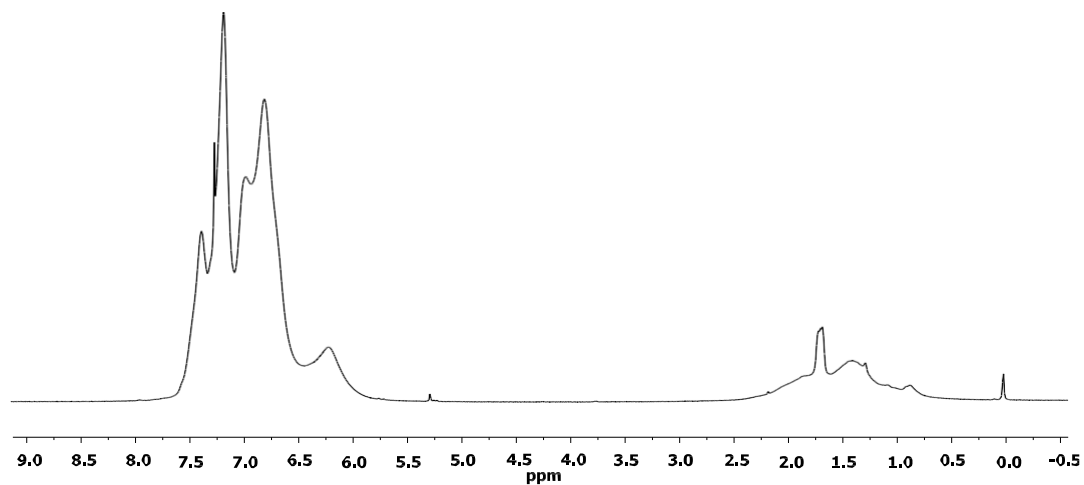

# Polymer **4a** $^{13}\text{C}$ NMR

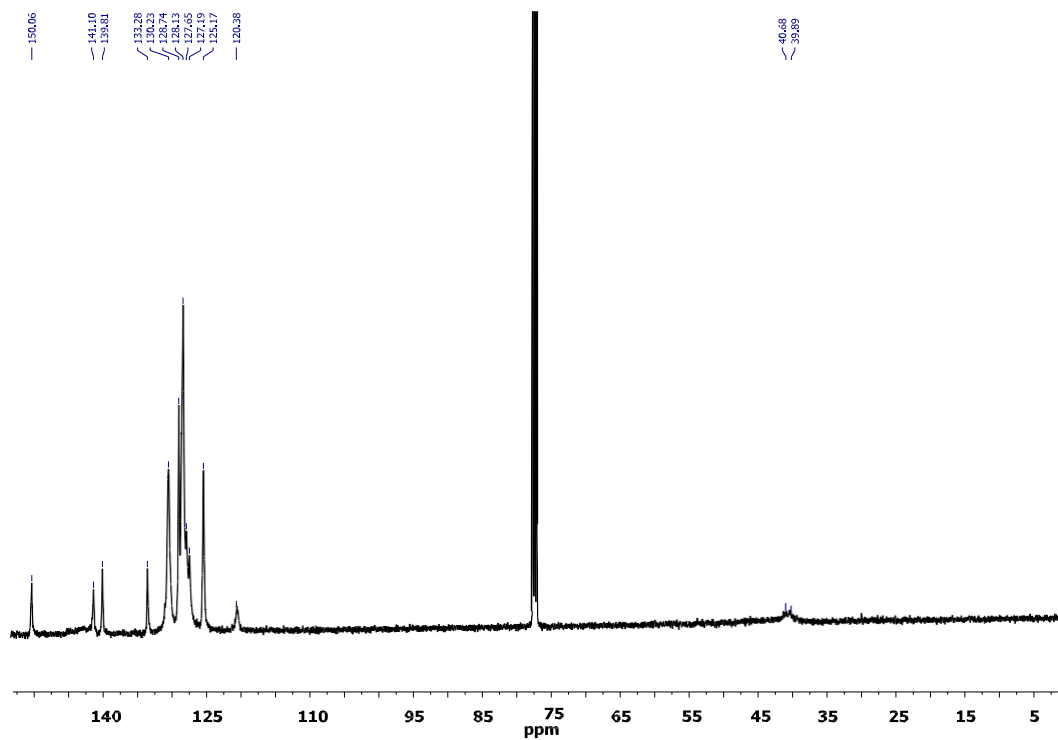

Polymer **4b**  $^1\text{H}$  NMR

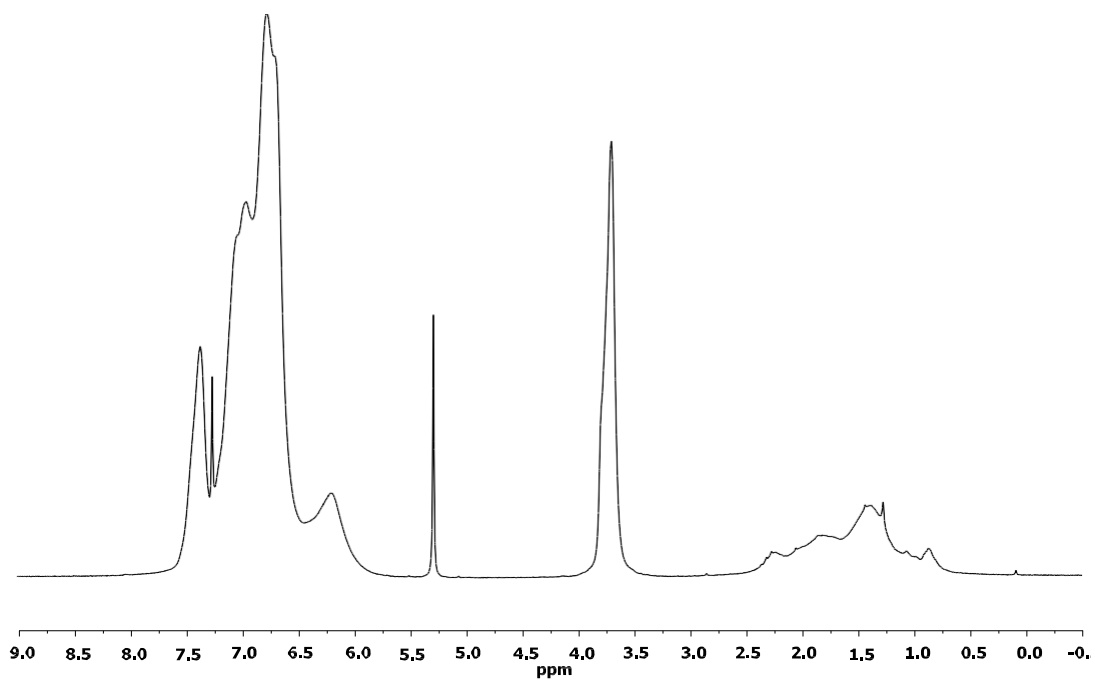

Polymer **4b**  $^{13}\text{C}$  NMR

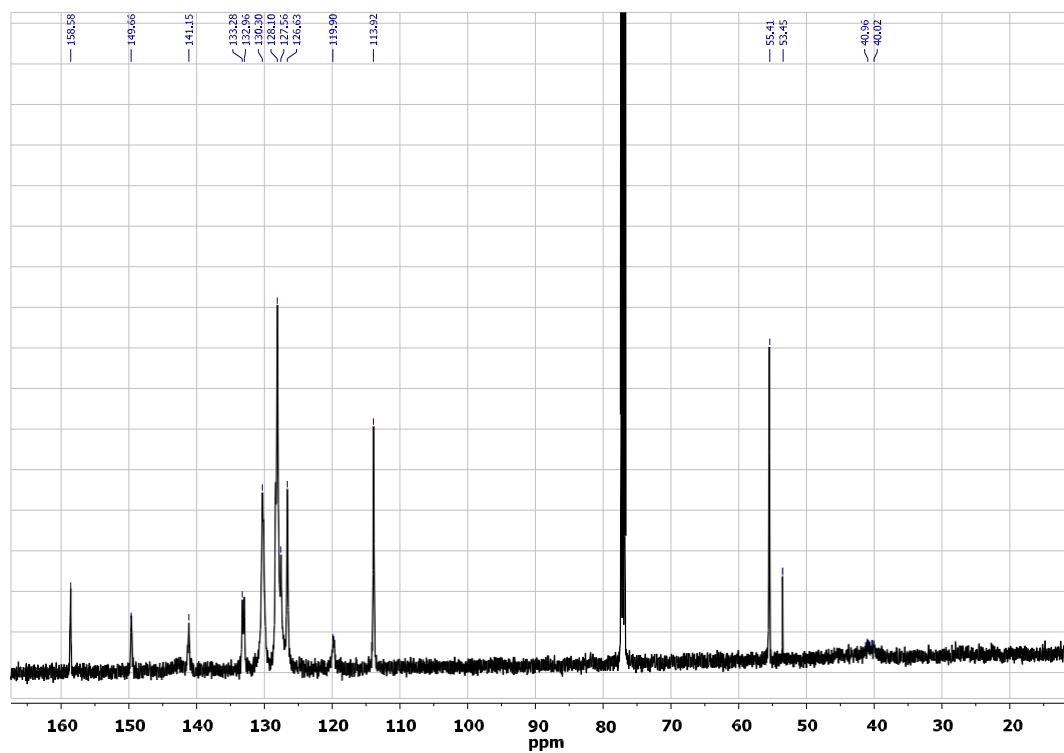



# Polymer **4c** $^1\text{H}$ NMR

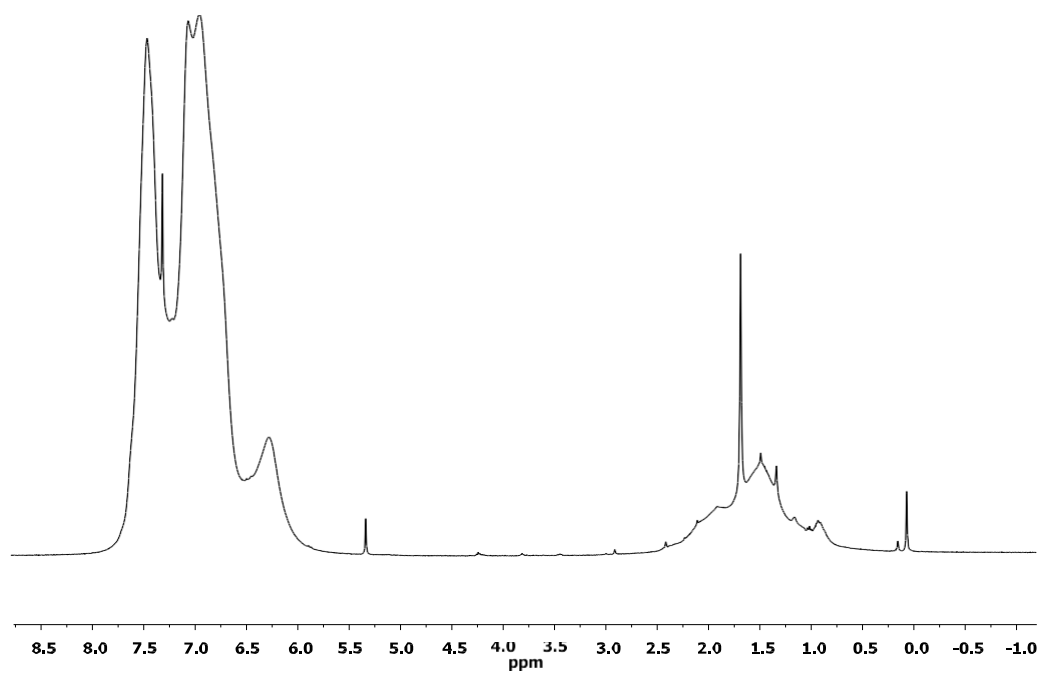

# Polymer **4c** $^{13}\text{C}$ NMR

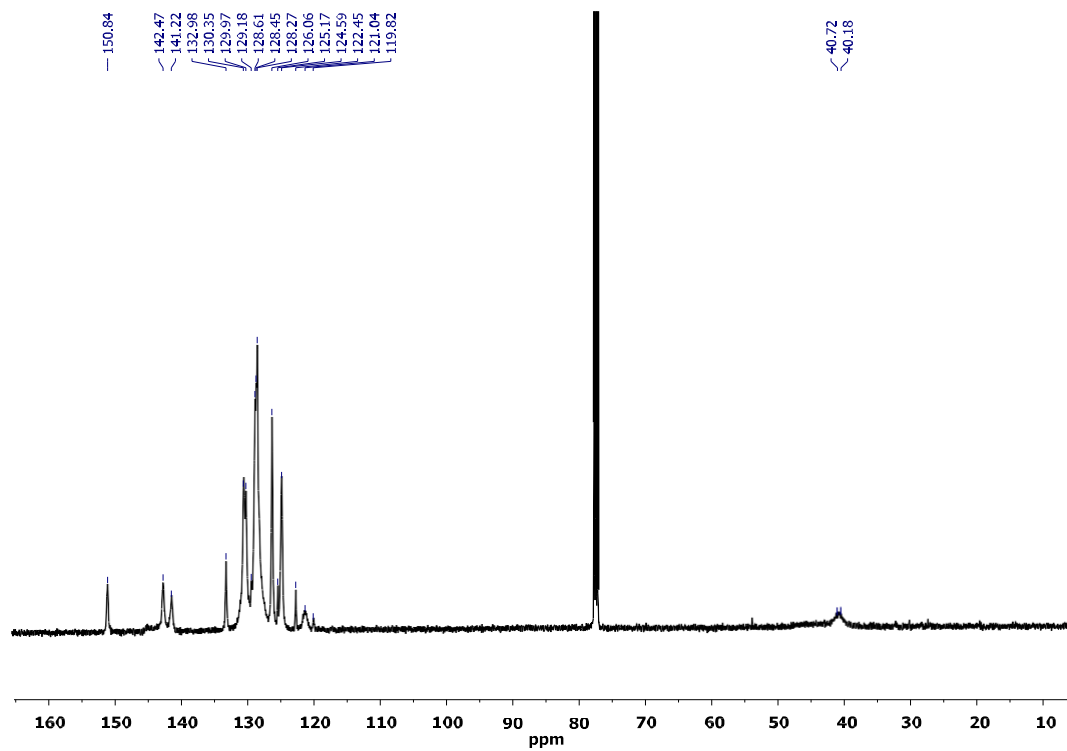

# Polymer **8** $^1\text{H}$ NMR

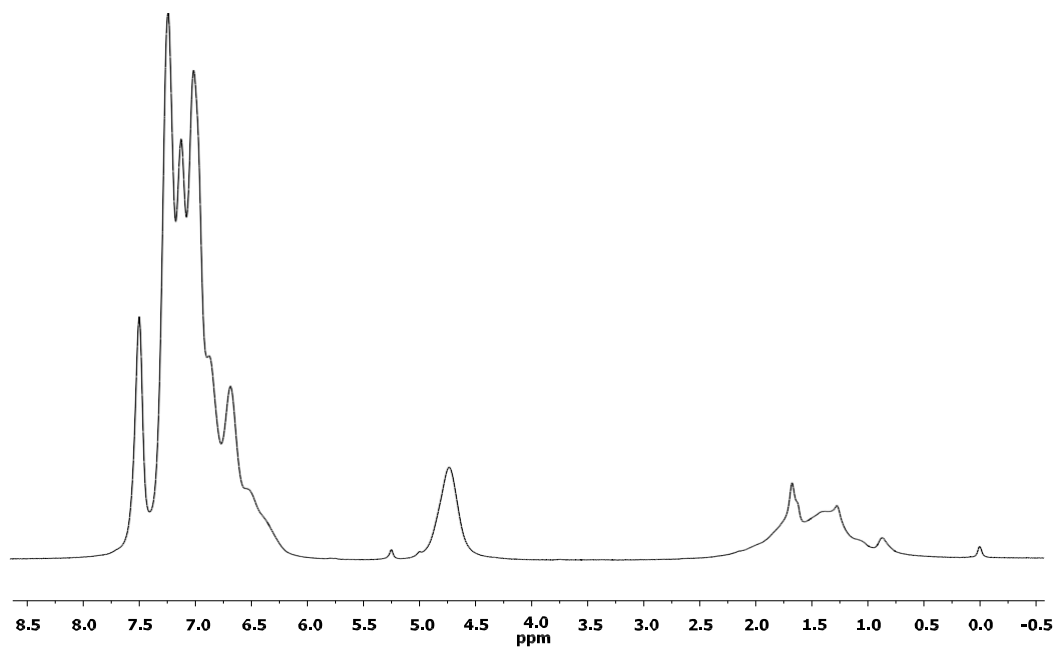

# Polymer **8** $^{13}\text{C}$ NMR

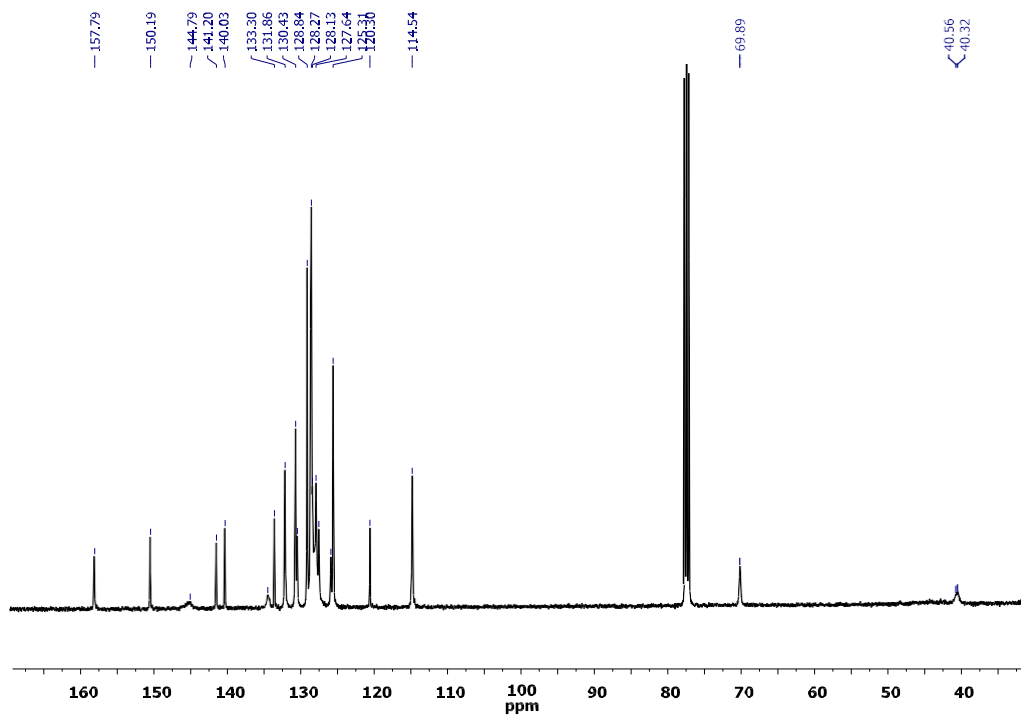

Supplement: c5py01218j1.pdf [file c5py01218j1.pdf]
